# Supplementary material
Source: PubMed Central journal article supplement (PMC7398428)
Supplement: NIHMS1605560-supplement-Supplemental_figures_1-10__tables_1-3.pdf [file NIHMS1605560-supplement-Supplemental_figures_1-10__tables_1-3.pdf]

Supplementary Figures and Legends

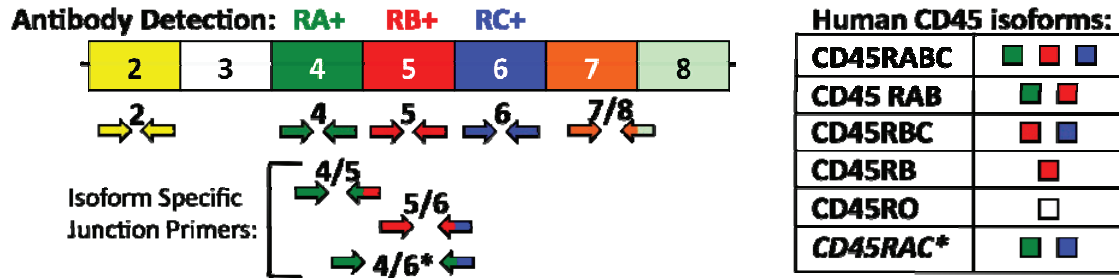

**Supplementary Figure 1.** Schematic of CD45 isoforms found in human cells and methods of detection. Exons 4-6 of *CD45* transcripts are variably lost during lymphocyte development to produce the top five isoforms shown in the table. Isoforms are named according to which of the variable exons are included, with the exception of CD45RO, in which all three variable exons are excluded. Isoform-specific antibodies to cell-surface CD45 are directed against the indicated variable exon, and cannot faithfully distinguish the various isoforms including the target exon. To complement flow cytometric analysis of cell-surface CD45, quantitative RT-PCR was utilized to quantify relative changes in exon inclusion. In addition to primer sets directed against the exon as a whole, exon junction spanning primer sets were used to specifically measure spliced products, as opposed to unspliced precursor, as indicated above. \* The CD45RAC isoform is not thought to be produced in human cells, but emerges following aberrant loss of CTCF binding, as demonstrated in Figures 1 and 2.

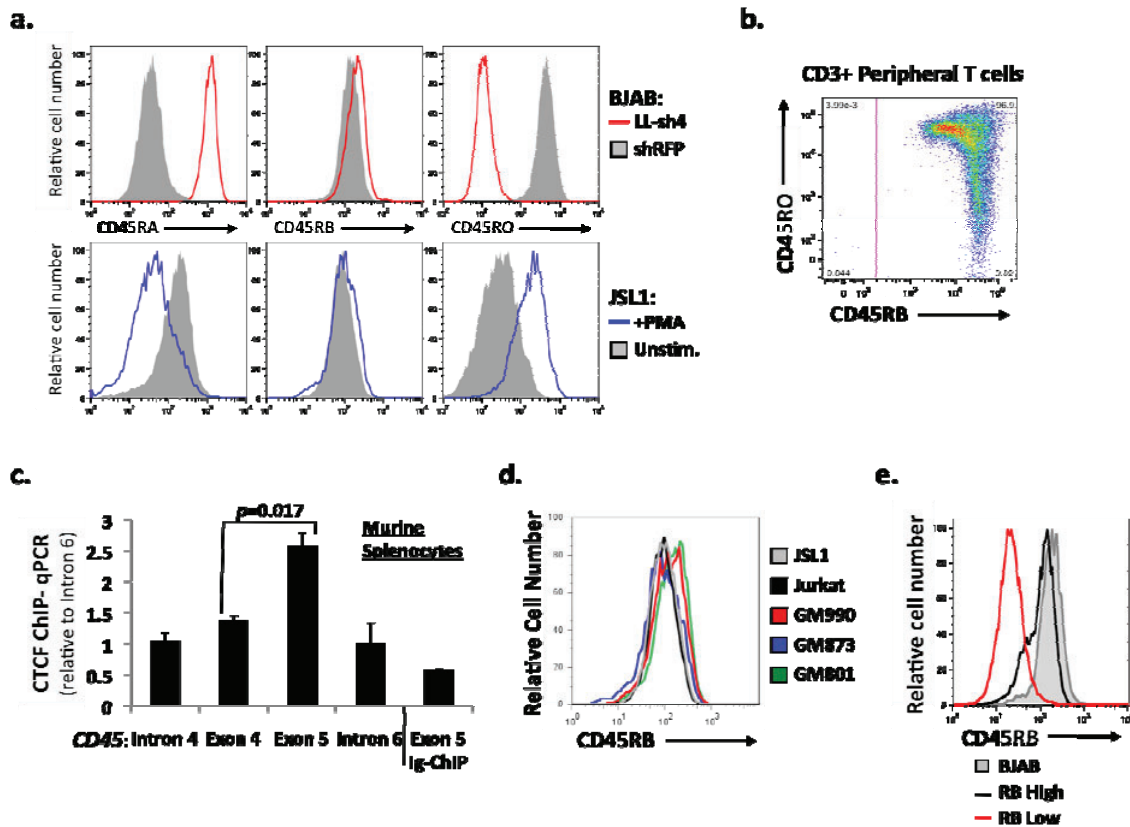

**Supplementary Figure 2.** (a) Cell-surface staining of CD45 isoforms in BJAB B and JSL1 T cells. shRNA-mediated depletion of hnRNPLL (LL-sh4) from BJAB cells reduces CD45RO, increases CD45RA and has no effect on CD45RB, as compared to control-transduced cells (shRFP). PMA-induced hnRNPLL expression in JSL1 cells increases CD45RO, decreases CD45RA and does not affect CD45RB expression. (b) CD3<sup>+</sup> T cells purified from human peripheral blood express high cell-surface CD45RB and variable CD45RO. Naïve T cells are CD45RB<sup>high</sup>/CD45RO<sup>low</sup> and transition to CD45RB<sup>low</sup>/CD45RO<sup>high</sup> following activation. (c) CTCF ChIP in murine splenocytes (distinct mouse from Fig. 1a) and qPCR to detect *CD45* exons shows CTCF binding at exon 5, and not at surrounding regions. Values represent means +/- SD from two independent immunoprecipitation experiments.  $p =$  two-tailed Student's  $t$  test comparing exon 5 values to exon 4 values. (d) Cell-surface CD45RB expression is uniformly high in tested T (JSL1, Jurkat) and B (GM) cell lines, as indicated. (e) Cell-surface staining for CD45RB in BJAB cells and stably maintained RB<sup>high</sup> and RB<sup>low</sup> BL41 cells.

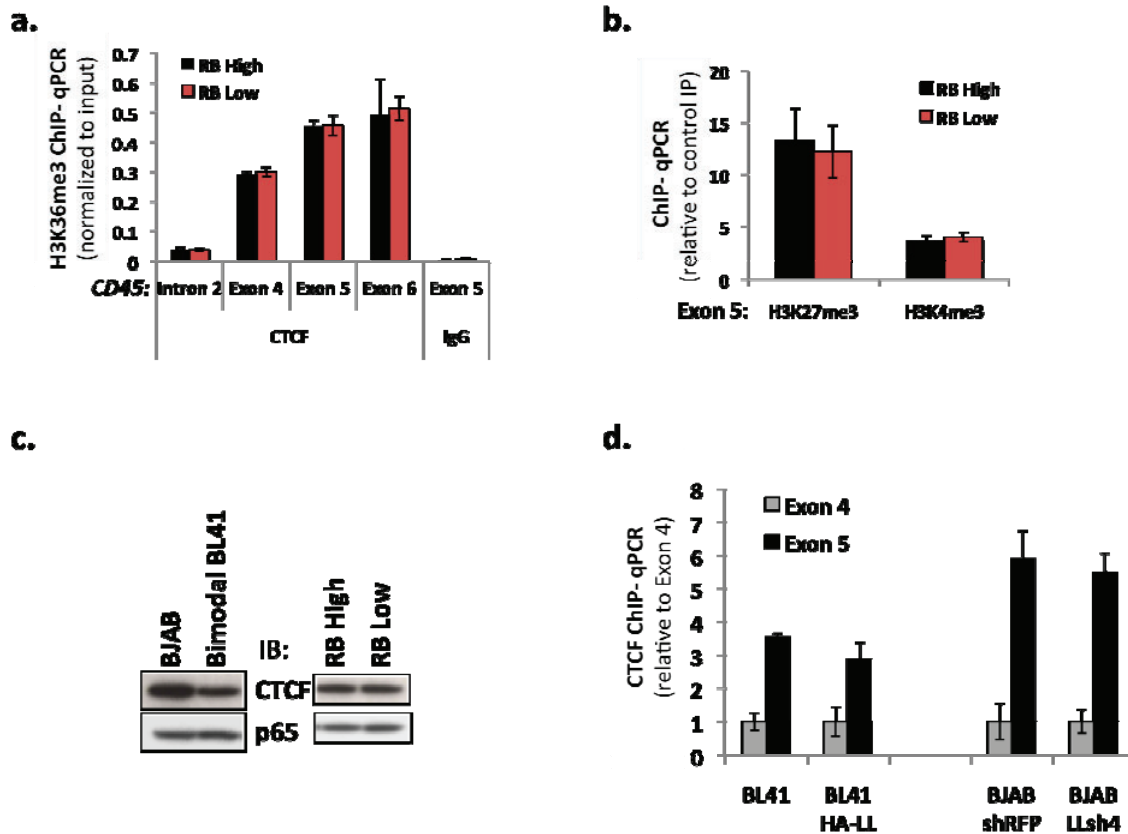

**Supplementary Figure 3.** ChIP with antibody specific for (a) H3K36me3 and (b) H3K4me3 and H3K27me3 in RB<sup>high</sup> and RB<sup>low</sup> BL41 cells and qPCR to detect *CD45* exons. H3K36me3, H3K27me3, and H3K4me3 levels are comparable at exon 5 in RB<sup>high</sup> and RB<sup>low</sup> cells. (c) Western Blot for CTCF expression in BJAB, bimodal BL41, RB<sup>high</sup> and RB<sup>low</sup> cells. Anti-p65 immunoblot serves as a loading control. (d) CTCF-ChIP in parental BL41 (RB<sup>high</sup>) and BJAB cells with stable expression (BL41, HA-LL) or depletion (BJAB, LL-sh4) of hnRNPLL versus control-transduced cells. Quantitative PCR of *CD45* exons indicates that hnRNPLL expression does not impact on CTCF binding at exon 5. For all graphs, ChIP values represent means +/- SD from three independent immunoprecipitation experiments.

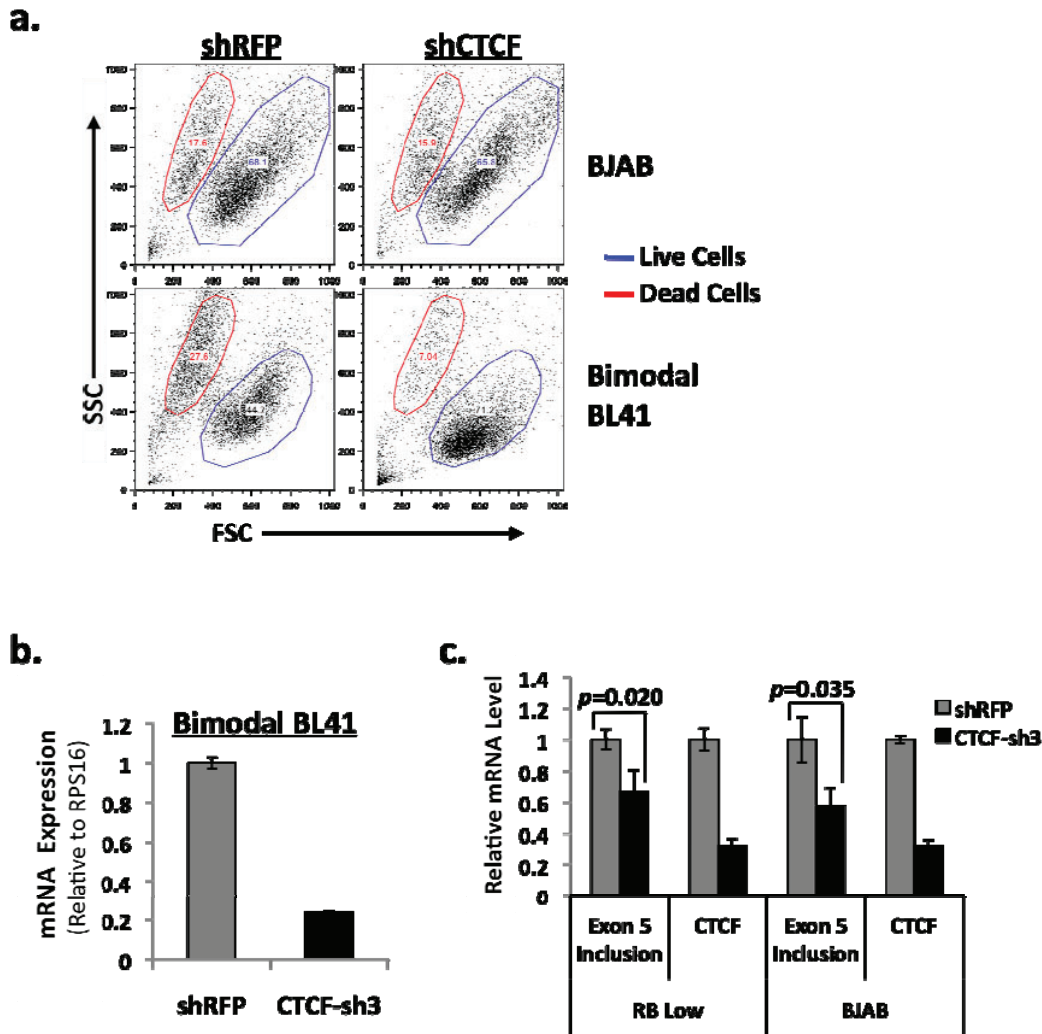

**Supplementary Figure 4. (a)** Forward scatter and side scatter plot of BJAB and bimodal BL41 cells transduced with shRNA directed against CTCF and RFP. Although infection resulted in some cell-death in both BJAB and BL41 cells, CTCF depletion did not increase cell-death as compared to control-transduced cells. **(b)** Quantitative RT-PCR analysis of *CTCF* levels in shCTCF and shRFP-transduced bimodal BL41 cells. These samples were used for the RNA-seq analysis presented in Figure 5 and Supplementary Figs. 8 and 9. **(c)** qRT-PCR data from three independently performed CTCF-depletions in RB<sup>low</sup> (left) and BJAB cells (right) to detect exon 5 inclusion as a ratio of 5/6 to 4/6 junctions, or CTCF knockdown efficiency relative to several housekeeping genes (*GAPDH*, *aldolase*, *L32* and *beta-actin*).

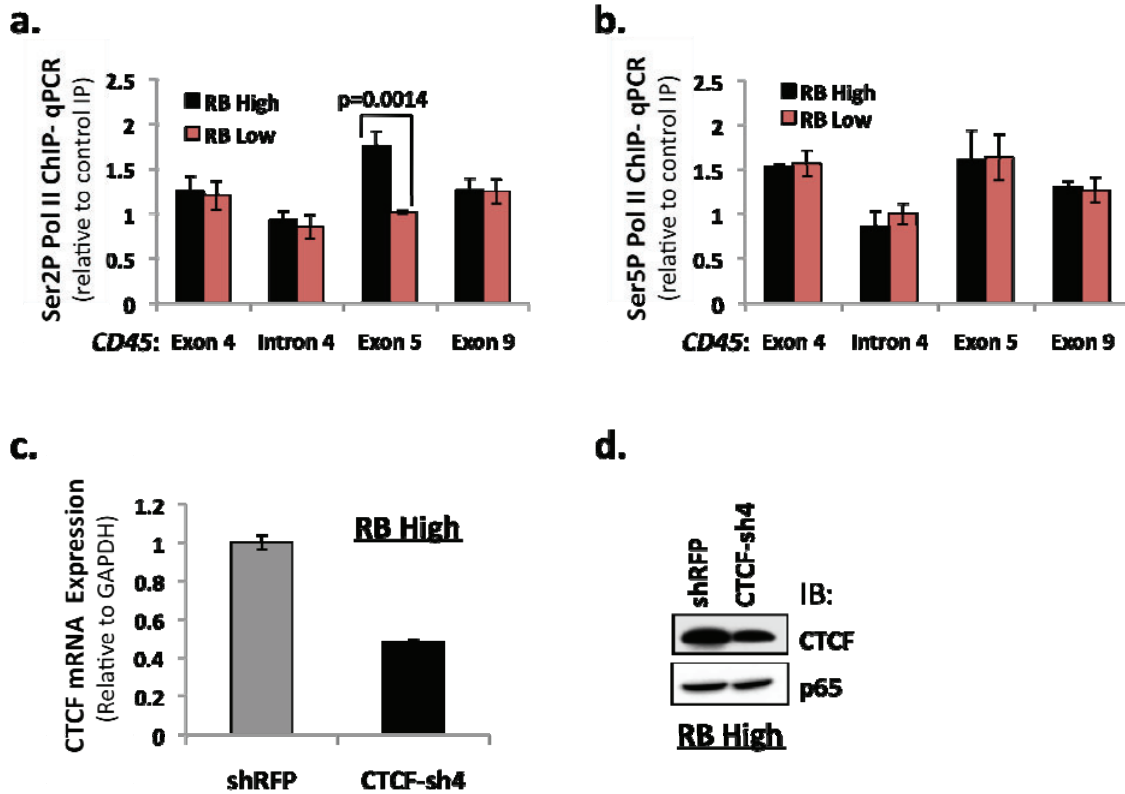

**Supplementary Figure 5.** ChIP with antibody specific for (a) pol II CTD phosphorylated on serine 2 (Ser2P) or (b) on serine 5 (Ser5P) in RB<sup>high</sup> and RB<sup>low</sup> cells and quantitative PCR detection of CD45 DNA relative to mouse Ig control ChIP. ChIP values represent means +/- SD from three independent experiments.  $p$  = two-tailed Student's  $t$  test comparing RB<sup>high</sup> to RB<sup>low</sup> values. (c) Quantitative RT-PCR in CTCF depleted RB<sup>high</sup> cells relative to shRFP-transduced cells from Fig. 3b, c. (d) Western blot for CTCF expression in cells from (c), and p65 immunoblotting as a loading control. CTCF depletion leads to significant cell death in RB<sup>high</sup> cells. To achieve sufficient cell numbers for ChIP experiments, transductions were performed in individual wells of a 96 well plate and pooled prior to further analysis.

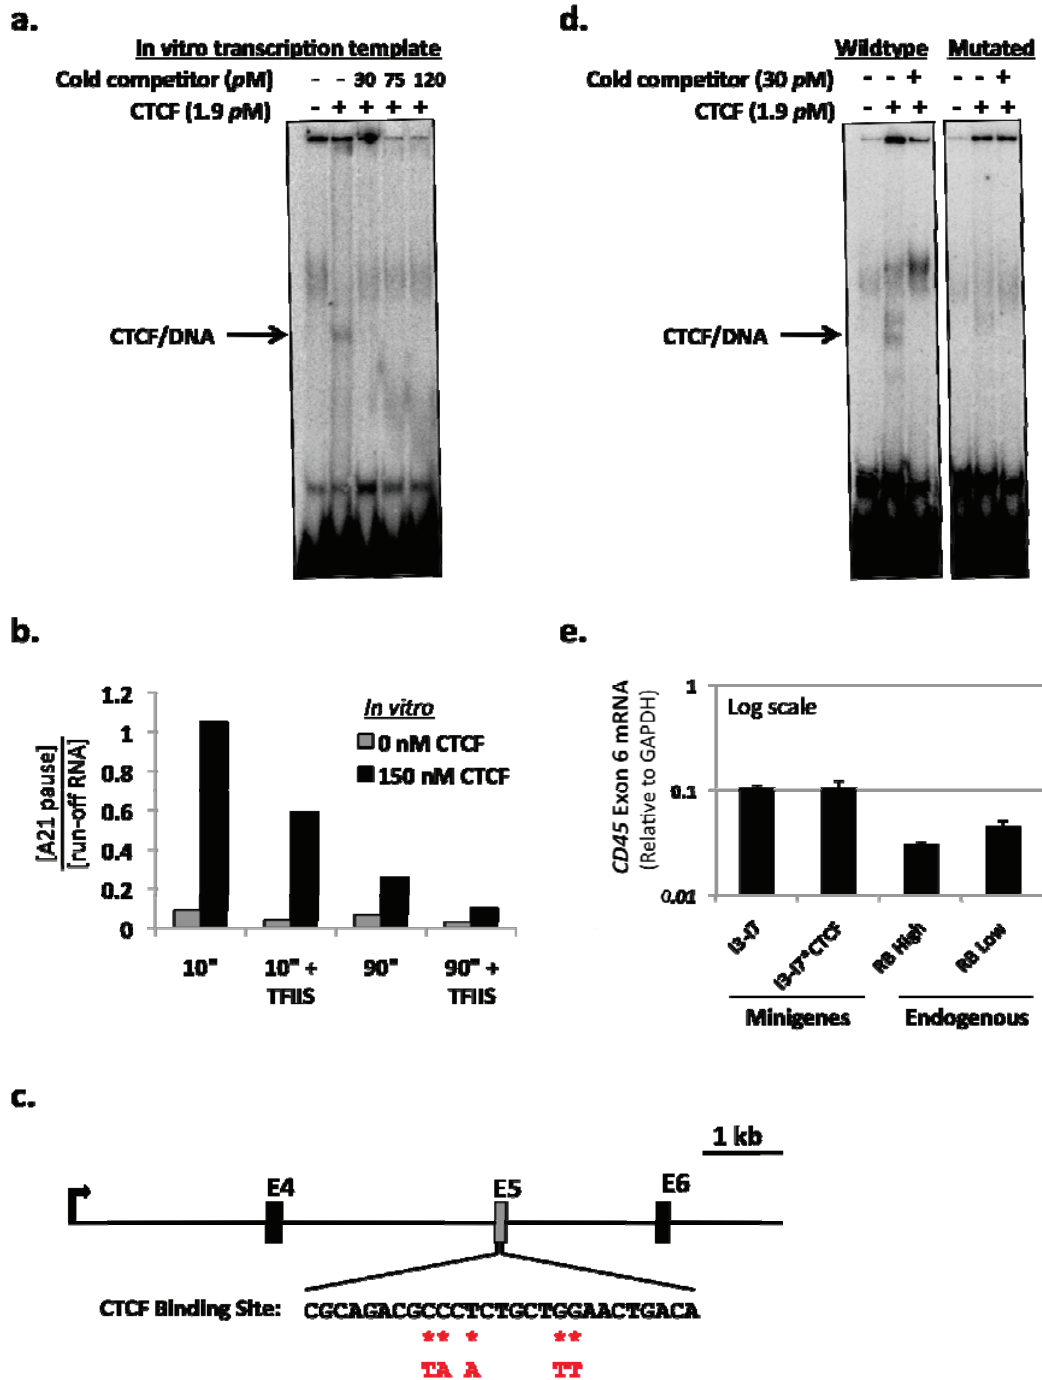

**Supplementary Figure 6.** (a) EMSA confirms CTFC binding to the DNA oligonucleotide used in the *in vitro* transcription assays (Fig. 3d). The arrow indicates the location of the DNA/protein complex. Incubation in the presence of unlabeled oligo effectively competed away formation of the labeled complex, indicating specific binding. (b) Quantification of pol II paused at A21 versus

run-off accumulation from Fig. 3d. **(c)** Description of nucleotides mutated to disrupt CTCF binding to exon 5 of the *CD45* minigene (Fig. 3f-j). A total of 5 substitutions were made within the binding core. **(d)** EMSA with a 25 base pair oligo encompassing the *CD45* exon 5 CTCF binding site (wildtype), as well as an oligo in which 5 nucleotides were mutated as shown in (c). In either case, incubation in the presence of unlabeled oligo competes away formation of the labeled complex, indicating specific binding. **(e)** Quantitative RT-PCR to detect expression of the *CD45* minigene in HEK293 cells as a function of exon 6 expression relative to *GAPDH*. *CD45* is highly transcribed in immune cells and levels derived from the *CD45* minigene constructs were within the physiological range, as shown for BL41 RB<sup>high</sup> and RB<sup>low</sup> cells.

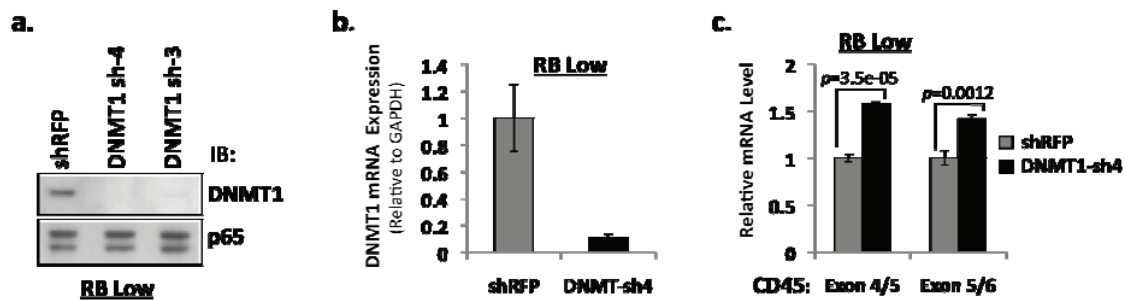

**Supplementary Figure 7.** **(a)** Western blot analysis for DNMT1 in RB<sup>low</sup> cells transduced with shRNA directed against DNMT1 or control shRNA against RFP (from Fig. 4e-h). p65 immunoblotting served as a loading control. **(b)** Quantitative RT-PCR detection of *DNMT1* transcript levels relative to *GAPDH* in RB<sup>low</sup> cells from (a). **(c)** Quantitative RT-PCR in cells from (a) to detect Exon 4/5 and Exon 5/6 junctions relative to Exon 6. In order to achieve sufficient cell numbers for ChIP following DNMT1 depletion, lentiviral transductions were performed in individual wells of a 96 well plate and pooled prior to assay. Values represent mean +/- SD from three independent RNA preparations from the pooled, bulk, polyclonal culture.

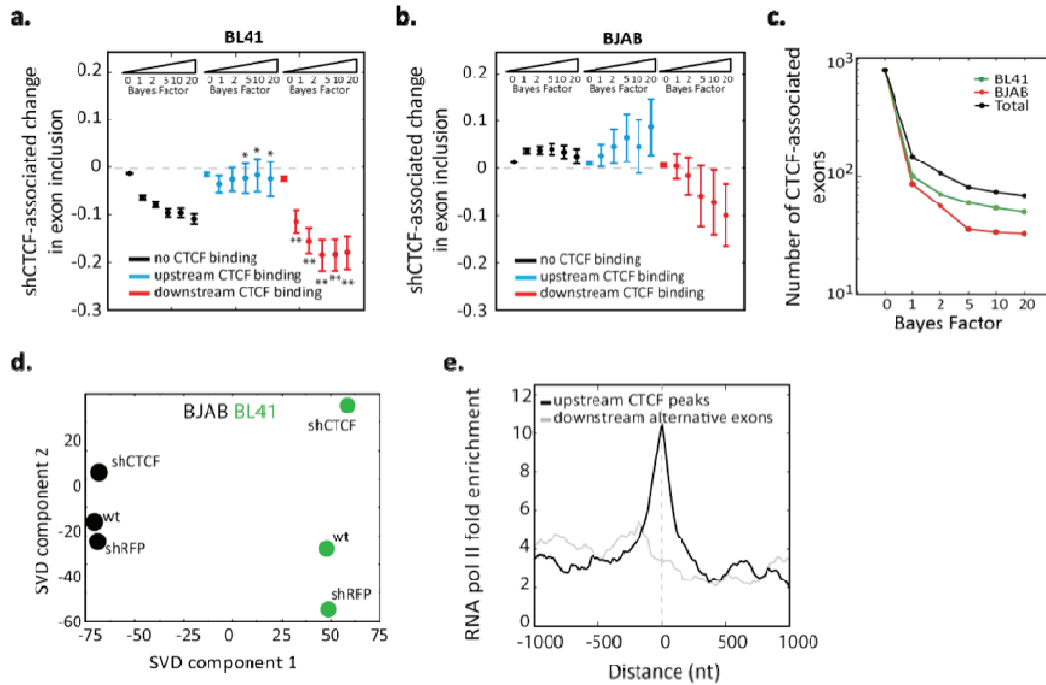

**Supplementary Figure 8.** Global identification of CTCF-dependent exons. **(a)** Difference in mean exon inclusion level between shCTCF transduced bimodal BL41 cells (from Fig. 2a) and untransduced control cells for exons with CTCF peak in upstream (blue) or downstream (red) regions but not in the exon body and for exons with no CTCF binding (black). The mean and standard error of the mean for each class of exons are plotted against increasing Bayes Factor thresholds. Statistically significant differences in exon inclusion levels between CTCF bound and unbound exons at different thresholds are indicated \* ( $p < 0.05$ ), \*\* ( $p < 0.01$ ), \*\*\* ( $p < 0.001$ ), wilcoxon rank sum test. The bias towards reduced exon inclusion for unbound exons in the comparison to untransduced cells, likely reflects alternative splicing in BL41 cells in response to lentiviral transduction. BL41 cells are particularly sensitive to transduction as compared to BJAB cells (Supplementary Fig. 4a). This bias was eliminated in the appropriate controlled comparison between shCTCF and shRFP transduced BL41 cells (Fig. 5b). **(b)** Same as (a) for BJAB shCTCF compared with shRFP control cells (from Fig. 2a). **(c)** Number of exons with downstream CTCF binding plotted against increasing Bayes Factor for BL41 (Figure 5b), BJAB (Figure 5c) and the union of exons. **(d)** Singular value decomposition analysis of gene expression levels in BJAB and BL41 for shCTCF, shRFP and wildtype cells. Samples are plotted against the two most informative components; where the first one separates BJAB cells from BL41 cells and the second component distinguishes shCTCF samples from control cells. **(e)** Same as in Figure 5d for CTCF peaks upstream of alternative exons and the corresponding downstream alternative exons.



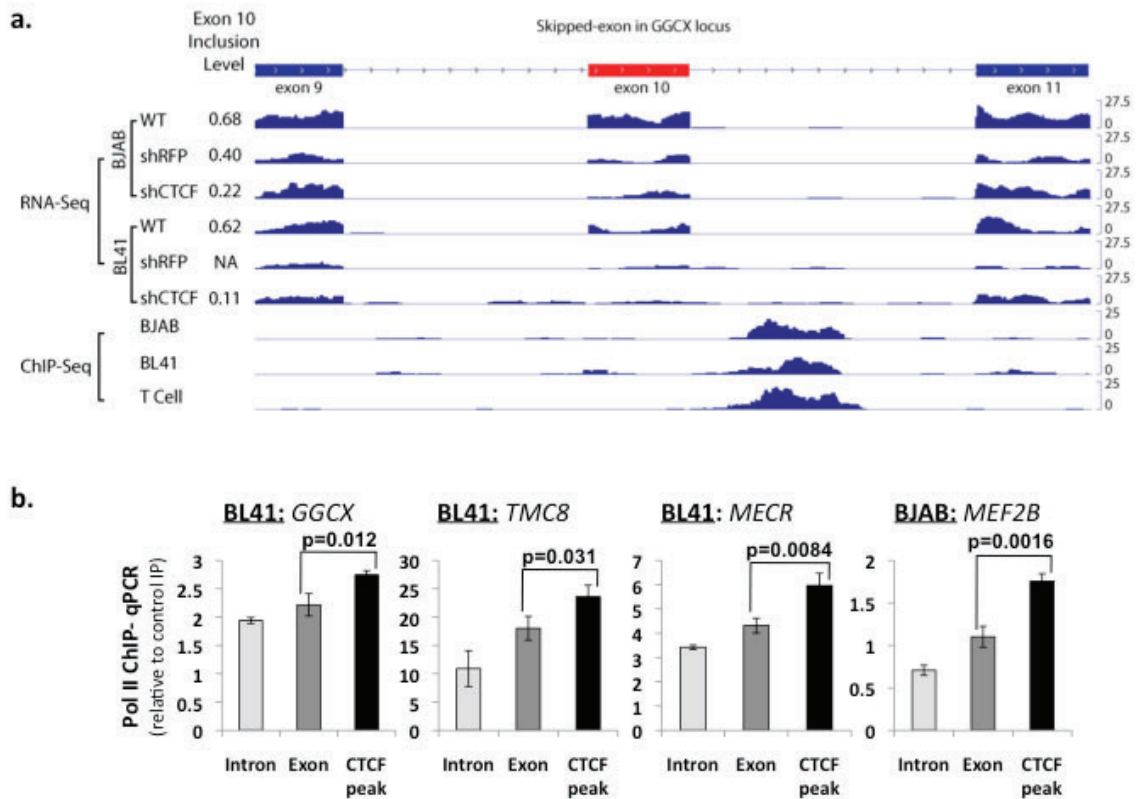

**Supplementary Figure 9. (a)** RNA-seq and CTCF-ChIP-seq in BJAB and BL41 cells at GGCX exon 10. CTCF ChIP-seq shows the location of a peak downstream of exon 10. Analysis of RNA-seq data shows a reduction in the relative inclusion of exon 10 in response to CTCF depletion. BL41 shRFP exon 10 inclusion levels could not be calculated due to insufficient total reads. **(b)** Quantitative PCR of pol II ChIP DNA from BJAB and BL41 cells at the location of the CTCF ChIP-seq peak (Supplementary Table 4), alternative upstream exon and control upstream intron. ChIP values represent means  $\pm$  SD from three independent IP experiments.  $p$ = two-tailed Student's  $t$  test comparing peak values to upstream exon values.

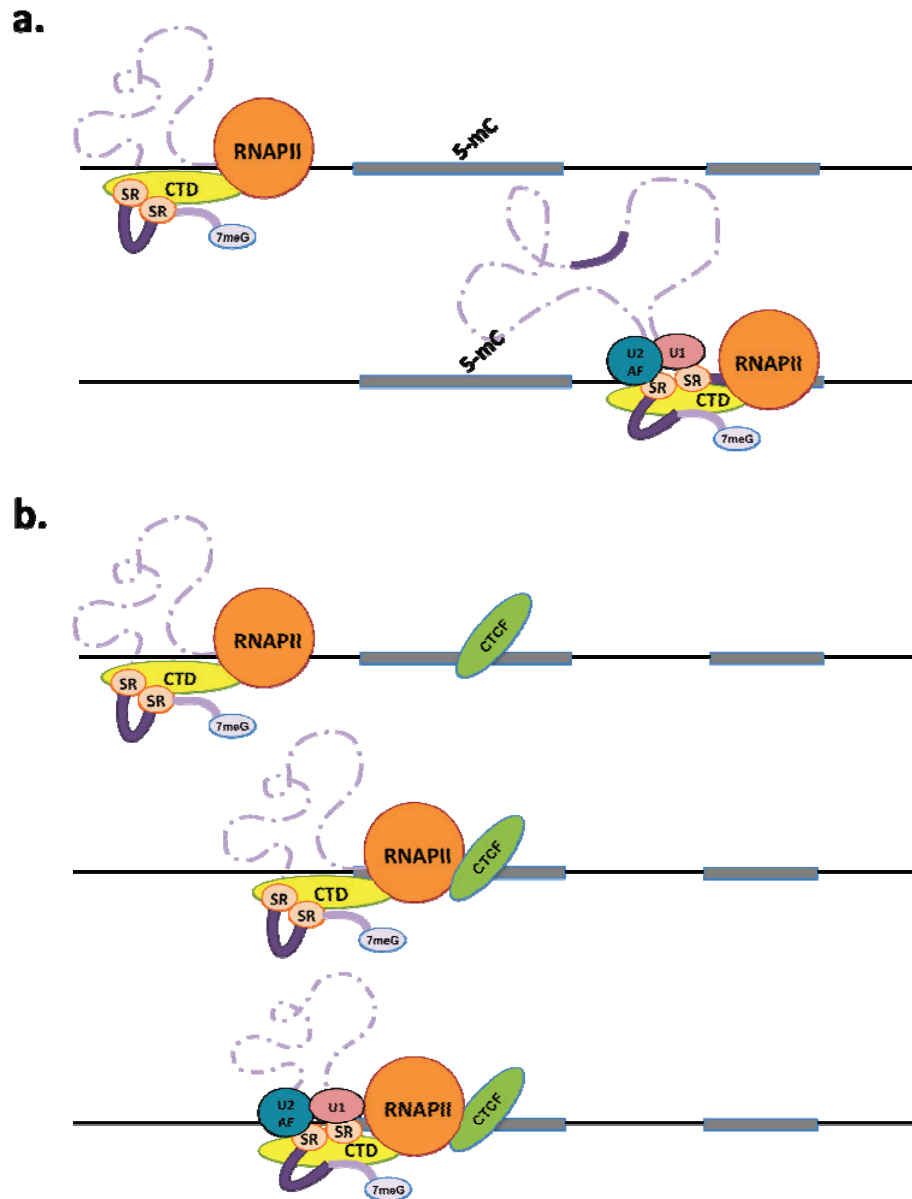

**Supplementary Figure 10.** Model for CTCF-mediated regulation of CD45 exon 5 alternative splicing. **(a)** The presence of methylated DNA at *CD45* exon 5 inhibits CTCF binding. In the absence of CTCF-mediated pol II pausing, exon 5 is excluded from spliced CD45 transcripts. **(b)** CTCF binds to and promotes local pol II pausing at *CD45* exon 5 when the target DNA is not methylated on cytosine. Pausing provides favorable conditions for spliceosome assembly prior to reactivation of elongation.

## Supplementary Tables

Supplementary Table 1. Primer sequences utilized for qPCR and mutagenesis.

| Primer Name         | Sequence (5'-3')                    |
|---------------------|-------------------------------------|
| CD45 In2 Fw         | GCT ATG GTG CCA CCT ACT GAA A       |
| CD45 In2 Rev        | ACA GTT ACT ACA TTC TAC ACT TTG ACT |
| CD45 ex4 Fw         | GCA AAG ATG CCC AGT GTT CCA CTT     |
| CD45 ex4 Rev        | TTC TCT TTC AAA GGT GCT TGC GGG     |
| CD45 In4 Fw         | AAC AGA TTC AGT TAC TTC ACA GTT TG  |
| CD45 In4 Rev        | CCA CTG GAG ATG AAT AAT TTA CTA AG  |
| CD45 ex5 Fw         | TCA TCA GTA CAG ACG CCT CAC CTT     |
| CD45 ex5 Rev        | CTG AAT GTC TGC GTG TCA GTT CCA     |
| CD45 In5 Fw         | AGC TCT TGA ATA GAG GGC AGC TCA     |
| CD45 In5 Rev        | ACA CCT TTG CCC AAC ATC ACA TCC     |
| CD45 ex6 Fw         | AGC ACC TTT CCT ACA GAC CCA GTT     |
| CD45 ex6 Rev        | TGT TCG CTG TGA TGG TGG TGT T       |
| CD45 In6 Fw         | TGG AAA GCC GTG AAT GAA AGG G       |
| CD45 In6 Rev        | CTT TGC TCT AGG AGT CCT CGT TTG     |
| CD45 Ex9 Fw         | GCACAAACAATGAGGTGCATAACC            |
| CD45 Ex9 Rev        | ATGTCTTATCAGGAGCAGTACATGA           |
| CD45-Ex4 FW         | CCC GCA AGC ACC TTT GAA AGA GAA     |
| CD45-Ex4/5 Rev      | TGT ACT GAT GAA ACA CCT GTG GTA     |
| CD45-Ex5 FW         | TTC ATC AGT ACA GAC GCC TCA CCT     |
| CD45-Ex5/6 Rev      | TCT CCT GGG ACA TCT GAG ATA GCA     |
| CD45- Ex4 FW        | GCA AAG ATG CCC AGT GTT CCA CTT     |
| CD45- Ex4/6 Rev     | CTC TCC TGG GAC ATC TGT GGT ATT     |
| CTCF ex2 Fw         | ACG GAC CTG AAG CCA AAG AAC AAG     |
| CTCF ex2 Rev        | GTG GCT GCA AAG TCA GTT TGA GGA     |
| RPS16 SET5 Fw       | AAA CGC GGC AAT GGT CTC ATC AAG     |
| RPS16 SET5 Rev      | TGG AGA TGG ACT GAC GGA TAG CAT     |
| GAPDH Fw            | TCG ACA GTC AGC CGC ATC TTC TTT     |
| GAPDH Rev           | ACC AAA TCC GTT GAC TCC GAC CTT     |
| DNMT1 Ex 4 Fw       | TGC TTA CAA CCG GGA AGT GAA TGG     |
| DNMT1 Ex 4 Rev      | TTG GCA TCT GCC ATT CCC ACT CTA     |
| GGCX CTCF peak Fw   | TTG TGG GCA TAG CTG GTT GCT TC      |
| GGCX CTCF peak Rev  | GGG TTA GTA GCT ACC TGA GAA GG      |
| GGCX Ex 10 Fw       | AAG CAA TAT GCC ACT TGC CTG AGC     |
| GGCX Ex 10 Rev      | GCG GTC ATT GAT GGA GAC CCA AAT     |
| GGCX In 8 Fw        | AGGCTGGACTTAGAAAGGAACGGA            |
| GGCX In 8 Rev       | AGTTGTTATAGCCCTGGGAAGGCA            |
| TMC 8 Ex 10 Fw      | ATGTTCTCCGTCTCCCTGGGTCA             |
| TMC 8 Ex 10 Rev     | AGTCACAAACGTTGTAGCCGTAGG            |
| TMC 8 CTCF peak Fw  | CACCTTTGAGAGAAGCTGTGAGCA            |
| TMC 8 CTCF peak Rev | TTGAGGATGGGATTAGAGCAGGAAGC          |
| TMC 8 In 9 Fw       | AAGCTGAGGTGGGAGGATCACTTA            |
| TMC 8 In 9 Rev      | AGATAGGGTCTCACTCCATTGCCT            |
| MECR Ex 5 Fw        | TCATCCAGAATGCATCCAACAGCG            |
| MECR Ex 5 Rev       | ACCACATTGATGGTTCTTAGGCC             |

|                            |                                            |
|----------------------------|--------------------------------------------|
| <b>MECR CTCF peak Fw</b>   | AGACCATGTCTTGGGTCTTTCCCA                   |
| <b>MECR CTCF peak Rev</b>  | TGACTCATCTGTTTCAGCCGCCAA                   |
| <b>MECR In 4 Fw</b>        | CAAAGCTAAACCTGGGCTTTGCCA                   |
| <b>MECR In 4 Rev</b>       | GGTGCACTGCCTTGAATGGGATT                    |
| <b>MEF2B CTCF peak Fw</b>  | TTCCGGTACGGATGGGCAGCTATTT                  |
| <b>MEF2B CTCF peak Rev</b> | GCAAAGGCTTGGCAGGAGGA                       |
| <b>MEF2B Ex 12 Fw</b>      | AAT TCC TGC CCA CCA GAA TAT GGC            |
| <b>MEF2B Ex 12 Rev</b>     | TCG TCT CAG GGC ACT TAC CTG G              |
| <b>MEF2B In 10 Fw</b>      | AGGGTGTGGCAGGGCTGATGA                      |
| <b>MEF2B In 10 Rev</b>     | TTCTCTGTGCGGAGAGAGGGTGAA                   |
| <b>Mouse CD45 Ex 4 Fw</b>  | AGAGAATGCCCTTCTTCTGCCTCA                   |
| <b>Mouse CD45 Ex 4 Rev</b> | TGTGGTCTCTGAAGAGCCATTTCC                   |
| <b>Mouse CD45 In 4 Fw</b>  | GCC TGT GGC ATT CCT TCC AAC TTT            |
| <b>Mouse CD45 In 4 Rev</b> | GTG CAC AAT CTG GTG TTG GCA GAA            |
| <b>Mouse CD45 Ex 5 Fw</b>  | TGT GTT ATC CAC GCT GCT GCC TCA            |
| <b>Mouse CD45 Ex 5 Rev</b> | TGG CTG CTG AAT GTC TGA GTG TCA            |
| <b>Mouse CD45 In 6 Fw</b>  | TGA GGC TCT TCT CTG ACT CCA GAT            |
| <b>Mouse CD45 In 6 Rev</b> | TCC TAG AGC TAC AAG CTG TTA ATG T          |
| <b>Mouse GAPDH Fw</b>      | ATGGGAAGCTTGTTCATCAACGGGA                  |
| <b>Mouse GAPDH Rev</b>     | AAGACACCAGTAGACTCCACGACA                   |
| <b>FW E5 Mut CTCF</b>      | /5Phos/GCT TTA ACT GAC ACG CAG ACA TTC AGC |
| <b>Rev E5 Mut CTCF</b>     | /5Phos/TGA GTA CGT CTG CGA GTC TGC GTG     |

Supplementary Table 2. ChIP- Seq data statistics

| Sample                                                       | Number of uniquely mapped reads | Number of identified peaks | % promoter | % polyA sites | % intragenic | % intergenic |
|--------------------------------------------------------------|---------------------------------|----------------------------|------------|---------------|--------------|--------------|
| BJAB_CTCF                                                    | 17,879,919                      | 38,565                     | 6.1        | 4.2           | 44.9         | 44.8         |
| BJAB_Rabbit Ig                                               | 15,413,930                      | NA                         |            |               |              |              |
| BL41_CTCF                                                    | 24,090,392                      | 36,795                     | 6.9        | 4.5           | 43.9         | 44.5         |
| BL41_Rabbit Ig                                               | 25,922,250                      | NA                         |            |               |              |              |
| <i>re-analyses of published data from Barski et al. 2007</i> |                                 |                            |            |               |              |              |
| CD4+ T-cells                                                 | 5,922,166                       | 33,347                     | 18.2       | 5.5           | 41.5         | 34.7         |

Supplementary Table 3. RNA-Seq data statistics

| Sample | Library-type | Number of reads* | % uniquely mapped | % splice-junctions | Exonic % | Intronic % | Intergenic % |
|--------|--------------|------------------|-------------------|--------------------|----------|------------|--------------|
|        |              |                  |                   |                    |          |            |              |

|                           |                                |            |      |       |       |      |       |
|---------------------------|--------------------------------|------------|------|-------|-------|------|-------|
| <b>BJAB<br/>wild type</b> | Paired-end<br>RNA-seq,<br>50bp | 49,990,036 | 91.8 | 11.61 | 74.56 | 6.01 | 16.15 |
| <b>BJAB<br/>shRFP</b>     | Paired-end<br>RNA-seq,<br>50bp | 35,304,049 | 92.5 | 11.89 | 76.42 | 6.74 | 15.19 |
| <b>BJAB<br/>shCTCF</b>    | Paired-end<br>RNA-seq,<br>50bp | 53,889,834 | 92.0 | 12.02 | 76.05 | 5.51 | 15.81 |
| <b>BL41<br/>wild type</b> | Paired-end<br>RNA-seq,<br>50bp | 49,911,365 | 91.4 | 11.36 | 74.16 | 5.71 | 18.19 |
| <b>BL41<br/>shRFP</b>     | Paired-end<br>RNA-seq,<br>50bp | 41,255,000 | 90.4 | 9.97  | 69.07 | 6.99 | 19.44 |
| <b>BL41<br/>shCTCF</b>    | Paired-end<br>RNA-seq,<br>50bp | 49,723,317 | 90.6 | 10.27 | 68.3  | 7.32 | 18.79 |
